# Supplementary material for: Dietary and Circulating Long‐Chain Omega‐3 Polyunsaturated Fatty Acids and Mortality Risk After Myocardial Infarction: A Long‐Term Follow‐Up of the Alpha Omega Cohort
Source: PubMed Central journal article supplement — J Am Heart Assoc. 2021 Nov 30;10(23):e022617. doi: 10.1161/JAHA.121.022617 (PMC9075367; doi:10.1161/jaha.121.022617), 2021-11-30
Supplement: JAH3-10-e022617-s001.pdf [file JAH3-10-e022617-s001.pdf]

SUPPLEMENTAL MATERIAL

Article: Dietary and circulating long-chain omega-3 fatty acids and mortality risk after myocardial infarction: a long-term follow up of the Alpha Omega Cohort

Authors: Pertiwi, Küpers, de Goede, Zock, Kromhout, Geleijnse

Contents:

- Supplemental Table 1 Percentage contribution of selected food groups to total intakes of EPA+DHA and ALA in the Alpha Omega Cohort
- Supplemental Table 2 Baseline characteristics of the Alpha Omega Cohort in categories of EPA+DHA intake
- Supplemental Table 3 Baseline characteristics of the Alpha Omega Cohort in categories of ALA intake
- Supplemental Table 4 Baseline characteristics of the Alpha Omega Cohort in quintiles of circulating ALA
- Supplemental Table 5 Associations of circulating EPA+DHA in categories based on converted Omega-3 index cut-offs with CHD, CVD and all-cause mortality in the Alpha Omega Cohort
- Supplemental Table 6 Sensitivity analyses for continuous associations of dietary and circulating n-3 FAs with all-cause, CVD and CHD mortality in the Alpha Omega Cohort
- Supplemental Figure 1 Flow diagram for selecting the population of analysis from the Alpha Omega Cohort
- Supplemental Figure 2 Associations of dietary ALA (in categories) and circulating ALA (in quintiles) with CHD, CVD and all-cause mortality
- Supplemental Figure 3 Associations of dietary EPA+DHA (per 100 mg/d) and ALA (per 1 g/d) with CHD mortality in subgroups of the Alpha Omega Cohort
- Supplemental Figure 4 Associations of circulating (A) EPA+DHA (per 1-SD) and (B) ALA (per 1-SD) with CHD mortality in subgroups of the Alpha Omega Cohort

Supplemental Table 1. Percentage contribution of selected food groups to total intakes of EPA+DHA and ALA in the Alpha Omega Cohort

|                                     | EPA+DHA        | ALA <sup>**</sup> |
|-------------------------------------|----------------|-------------------|
| Grain products <sup>*</sup>         | - <sup>†</sup> | 19                |
| Meat and poultry                    | 5              | 7                 |
| Eggs                                | 4              | - <sup>†</sup>    |
| Milk and milk products <sup>‡</sup> | - <sup>†</sup> | 6                 |
| Fish <sup>§</sup>                   | 89             | 3                 |
| Nuts and seeds <sup>  </sup>        | - <sup>†</sup> | 4                 |
| Vegetables and potatoes             | - <sup>†</sup> | 6                 |
| Legumes                             | - <sup>†</sup> | 1                 |
| Cooking oils                        | - <sup>†</sup> | 26                |
| Margarine                           | - <sup>†</sup> | 14                |
| Dressings <sup>#</sup>              | - <sup>†</sup> | 6                 |
| Savory spreads                      | 2              | 3                 |

<sup>\*</sup>Grain products include bread, pie, pancake, pizza, noodle; <sup>†</sup>contribution <1%; <sup>‡</sup>milk and milk products include butter; <sup>§</sup>fish include oily fish (50%), lean fish and shellfish; <sup>||</sup>nuts and seeds include peanut butter; <sup>#</sup>dressings include creamy (mayonnaise-based) and oil-vinegar dressings.

<sup>\*\*</sup>Values for ALA do not add up to 100% because snacks and unknown sources are not in the Table.

Supplemental Table 2. Baseline characteristics of the Alpha Omega Cohort in categories of dietary EPA+DHA intake

|                                         | Dietary EPA+DHA intake, adjusted for energy |                        |                          |                   | <i>P</i> * |
|-----------------------------------------|---------------------------------------------|------------------------|--------------------------|-------------------|------------|
|                                         | ≤50 mg/d (n=1113)                           | 51 to 100 mg/d (n=815) | 101 to 200 mg/d (n=1234) | >200 mg/d (n=905) |            |
| Age, y                                  | 69.5±5.6                                    | 69.3±5.5               | 68.5±5.6                 | 68.6±5.6          | <0.001     |
| Men                                     | 882 (79.2)                                  | 654 (80.2)             | 975 (79.0)               | 710 (78.4)        | 0.83       |
| Body mass index, kg/m <sup>2†</sup>     | 27.6±3.8                                    | 27.6±3.7               | 27.9±3.8                 | 27.7±3.9          | 0.35       |
| Obese (≥30 kg/m <sup>2</sup> )          | 242 (21.8)                                  | 192 (23.6)             | 304 (24.6)               | 215 (23.8)        | 0.42       |
| Time since MI, y <sup>†</sup>           | 3.8 (1.8-6.6)                               | 3.8 (1.7-6.1)          | 3.8 (1.7-6.4)            | 3.3 (1.5-6.0)     | 0.15       |
| Smoking status <sup>†</sup>             |                                             |                        |                          |                   | 0.65       |
| Never                                   | 181 (16.3)                                  | 119 (14.6)             | 200 (16.2)               | 163 (18.0)        |            |
| Former                                  | 751 (67.5)                                  | 559 (68.6)             | 822 (66.6)               | 598 (66.1)        |            |
| Current                                 | 180 (16.2)                                  | 137 (16.8)             | 212 (17.2)               | 144 (15.9)        |            |
| Physical activity <sup>†</sup>          |                                             |                        |                          |                   | <0.001     |
| Low                                     | 522 (47.3)                                  | 373 (46.1)             | 465 (37.9)               | 292 (32.3)        |            |
| Middle                                  | 357 (32.4)                                  | 288 (35.6)             | 505 (41.1)               | 378 (41.8)        |            |
| High                                    | 224 (20.3)                                  | 149 (18.4)             | 258 (21.0)               | 234 (25.9)        |            |
| Highest level of education <sup>†</sup> |                                             |                        |                          |                   | <0.001     |
| Primary                                 | 265 (23.9)                                  | 187 (23.2)             | 223 (18.1)               | 128 (14.2)        |            |
| Lower secondary                         | 432 (39.0)                                  | 318 (39.5)             | 418 (34.0)               | 294 (32.6)        |            |
| Higher secondary or lower tertiary      | 308 (27.8)                                  | 229 (28.4)             | 421 (34.2)               | 317 (35.2)        |            |
| Higher tertiary                         | 104 (9.4)                                   | 72 (8.9)               | 168 (13.7)               | 162 (18.0)        |            |
| Alcohol intake                          |                                             |                        |                          |                   | <0.001     |
| No                                      | 67 (6.0)                                    | 41 (5.0)               | 51 (4.1)                 | 44 (4.9)          |            |
| Low                                     | 651 (58.5)                                  | 459 (56.3)             | 622 (50.4)               | 423 (46.7)        |            |
| Moderate                                | 279 (25.1)                                  | 194 (23.8)             | 342 (27.7)               | 252 (27.9)        |            |
| High                                    | 116 (10.4)                                  | 121 (14.9)             | 219 (17.8)               | 186 (20.6)        |            |
| Medication use                          |                                             |                        |                          |                   |            |
| Statins                                 | 937 (84.2)                                  | 692 (84.9)             | 1068 (86.6)              | 797 (88.1)        | 0.06       |
| Antithrombotic drugs                    | 1084 (97.4)                                 | 800 (98.2)             | 1207 (97.8)              | 887 (98.0)        | 0.67       |
| Antihypertensive drugs                  | 995 (89.4)                                  | 727 (89.2)             | 1113 (90.2)              | 815 (90.1)        | 0.86       |
| Serum lipids, mmol/L <sup>‡,§</sup>     |                                             |                        |                          |                   |            |

Online Supporting Material

|                                      | Dietary EPA+DHA intake, adjusted for energy |                        |                          |                   | <i>P</i> <sup>*</sup> |
|--------------------------------------|---------------------------------------------|------------------------|--------------------------|-------------------|-----------------------|
|                                      | ≤50 mg/d (n=1113)                           | 51 to 100 mg/d (n=815) | 101 to 200 mg/d (n=1234) | >200 mg/d (n=905) |                       |
| Total cholesterol                    | 4.68±0.96                                   | 4.74±0.93              | 4.73±0.94                | 4.69±0.97         | 0.79                  |
| LDL cholesterol                      | 2.54±0.81                                   | 2.61±0.81              | 2.59±0.80                | 2.56±0.84         | 0.92                  |
| HDL cholesterol                      | 1.27±0.33                                   | 1.25±0.33              | 1.29±0.33                | 1.32±0.38         | <0.001                |
| Triglycerides                        | 1.68 (1.23-2.32)                            | 1.79 (1.28-2.42)       | 1.63 (1.20-2.32)         | 1.57 (1.18-2.21)  | 0.002                 |
| Plasma glucose, mmol/L <sup>‡</sup>  | 5.63 (5.08-6.59)                            | 5.58 (5.00-6.58)       | 5.60 (5.08-6.68)         | 5.59 (5.05-6.46)  | 0.48                  |
| Blood pressure (mmHg) <sup>†</sup>   |                                             |                        |                          |                   |                       |
| Systolic                             | 141±22                                      | 142±21                 | 142±21                   | 143±22            | 0.16                  |
| Diastolic                            | 80±11                                       | 80±11                  | 80±11                    | 81±11             | 0.048                 |
| Prevalent diabetes                   | 224 (20.1)                                  | 172 (21.1)             | 248 (20.1)               | 169 (18.7)        | 0.65                  |
| Family history of MI                 | 125 (11.2)                                  | 90 (11.1)              | 139 (11.3)               | 113 (12.5)        | 0.76                  |
| Family history of diabetes           | 218 (19.6)                                  | 160 (19.6)             | 250 (20.3)               | 206 (22.8)        | 0.28                  |
| Dietary factors                      |                                             |                        |                          |                   |                       |
| Energy, kcal/d                       | 1959±525                                    | 1896±530               | 1898±505                 | 1931±514          | 0.65                  |
| Protein, en%                         | 14.3±2.7                                    | 14.8±2.9               | 15.1±2.7                 | 15.9±2.8          | <0.001                |
| Total fat, en%                       | 34.3±6.4                                    | 34.1±6.4               | 33.7±6.0                 | 33.0±5.9          | <0.001                |
| SFAs, en%                            | 13.0±3.2                                    | 12.7±3.1               | 12.4±2.9                 | 11.8±2.9          | <0.001                |
| <i>cis</i> MUFAs, en%                | 9.4±2.2                                     | 9.4±2.2                | 9.5±2.1                  | 9.7±2.2           | <0.001                |
| PUFAs, en%                           | 7.3±2.4                                     | 7.3±2.2                | 7.3±2.2                  | 7.1±2.2           | 0.11                  |
| Total n-3 FAs, en%                   | 0.65±0.25                                   | 0.67±0.25              | 0.71±0.24                | 0.82±0.25         | <0.001                |
| ALA, g/d <sup>  </sup>               | 1.07±0.53                                   | 1.10±0.49              | 1.11±0.48                | 1.08±0.47         | 0.98                  |
| EPA+DHA, mg/d <sup>  </sup>          | 26 (12-37)                                  | 75 (63-87)             | 141 (121-165)            | 339 (255-454)     | <0.001                |
| Total n-6 FAs, en%                   | 5.6±2.2                                     | 5.5±2.1                | 5.5±2.1                  | 5.3±2.0           | <0.001                |
| <i>trans</i> -FAs, g/d <sup>  </sup> | 1.7±0.7                                     | 1.6±0.6                | 1.5±0.6                  | 1.5±0.6           | <0.001                |
| Carbohydrates, en%                   | 47.9±6.8                                    | 46.7±7.0               | 46.3±6.6                 | 45.9±6.6          | <0.001                |
| Fiber, g/d <sup>  </sup>             | 21.9±7.0                                    | 21.0±7.0               | 21.2±6.5                 | 22.1±6.6          | 0.13                  |
| Cholesterol, mg/d <sup>  </sup>      | 170±67                                      | 180±67                 | 187±67                   | 199±71            | <0.001                |
| Total fish (g/d)                     | 1.8 (0.1-4.3)                               | 9.6 (6.3-14.8)         | 15.6 (12.8-17.8)         | 39.8 (26.7-44.2)  | <0.001                |
| Oily fish (g/d)                      | 0.4 (0-1.2)                                 | 3.2 (1.8-4.6)          | 7.5 (5.9-9.6)            | 20.6 (14.4-28.3)  | <0.001                |
| DHD-15 score                         | 75.2±13.1                                   | 77.0±13.0              | 79.8±12.6                | 85.4±13.5         | <0.001                |

|                              | Dietary EPA+DHA intake, adjusted for energy |                        |                          |                   | <i>P</i> <sup>*</sup> |
|------------------------------|---------------------------------------------|------------------------|--------------------------|-------------------|-----------------------|
|                              | ≤50 mg/d (n=1113)                           | 51 to 100 mg/d (n=815) | 101 to 200 mg/d (n=1234) | >200 mg/d (n=905) |                       |
| Circulating FAs, % total FAs |                                             |                        |                          |                   |                       |
| SFAs                         | 13.1±1.1                                    | 13.1±1.3               | 13.2±1.1                 | 13.2±1.1          | 0.07                  |
| MUFAs                        | 22.4±3.1                                    | 22.4±3.3               | 22.6±3.2                 | 22.7±3.3          | 0.027                 |
| PUFAs                        | 63.1±4.0                                    | 63.1±4.2               | 62.9±4.0                 | 62.7±4.1          | 0.027                 |
| Total n-3 PUFAs              | 2.02 (1.74-2.43)                            | 2.21 (1.87-2.64)       | 2.46 (2.08-3.03)         | 2.94 (2.37-3.70)  | <0.001                |
| ALA                          | 0.51±0.15                                   | 0.51±0.15              | 0.50±0.14                | 0.51±0.14         | 0.47                  |
| EPA                          | 0.88 (0.68-1.13)                            | 0.97 (0.73-1.26)       | 1.14 (0.85-1.58)         | 1.48 (1.06-2.07)  | <0.001                |
| DHA                          | 0.54 (0.44-0.67)                            | 0.62 (0.52-0.75)       | 0.71 (0.59-0.85)         | 0.84 (0.66-0.98)  | <0.001                |
| Total n-6 PUFAs              | 60.7±4.2                                    | 60.5±4.5               | 60.1±4.3                 | 59.4±4.4          | <0.001                |
| Linoleic acid, 18:2 n-6      | 50.3±5.0                                    | 50.2±5.0               | 49.8±4.9                 | 49.6±5.0          | 0.001                 |
| Arachidonic acid, 20:4 n-6   | 8.6±2.1                                     | 8.5±2.1                | 8.4±2.0                  | 8.0±2.0           | <0.001                |

ALA, alpha-linolenic acid; DHA, docosahexaenoic acid; DHD-15, 2015 Dutch Healthy Diet score; EPA, eicosapentaenoic acid; FAs, fatty acids; MI, myocardial infarction; MUFAs, monounsaturated fatty acids; PUFAs, polyunsaturated fatty acids; Q, quintile; SFAs, saturated fatty acids; TFAs, *trans*-fatty acids.

Values are shown as mean ±SD, median (IQR) or *n* (%) unless stated otherwise. \**P* value for linear trend, through median values across categories of intake using a linear regression model, or obtained from chi-square test for categorical variables; †<1% of patients had missing values for body mass index, time since MI, smoking status, physical activity, educational level and blood pressure; ‡part of the cohort had missing values for total cholesterol, HDL cholesterol and triglycerides (n=61), LDL cholesterol (n=252) and plasma glucose (n=33); §to convert to mg/dL, divide by 0.02586 for total, LDL, HDL cholesterol and by 0.01129 for triglycerides; ¶values for dietary TFAs, fiber and cholesterol were non-energy adjusted.

Supplemental Table 3. Baseline characteristics of the Alpha Omega Cohort in categories of dietary ALA intake

|                                      | Dietary ALA intake, adjusted for energy |                             |                             |                            |                     | <i>P</i> * |
|--------------------------------------|-----------------------------------------|-----------------------------|-----------------------------|----------------------------|---------------------|------------|
|                                      | ≤0.5 g/d<br>(n=222)                     | >0.5 to 1.0 g/d<br>(n=1902) | >1.0 to 1.5 g/d<br>(n=1285) | >1.5 to 2.0 g/d<br>(n=412) | >2.0 g/d<br>(n=246) |            |
| Age, y                               | 69.3±5.4                                | 69.2±5.6                    | 68.9±5.6                    | 68.3±5.6                   | 68.6±5.4            | 0.002      |
| Men                                  | 198 (89.2)                              | 1477 (77.7)                 | 976 (76.0)                  | 351 (85.2)                 | 219 (89.0)          | <0.001     |
| Body mass index, kg/m <sup>2</sup> † | 27.0±3.3                                | 27.8±3.8                    | 27.8±3.9                    | 27.8±3.9                   | 27.7±3.4            | 0.27       |
| Obese (≥30 kg/m <sup>2</sup> )       | 33 (14.9)                               | 467 (24.6)                  | 311 (24.2)                  | 93 (22.6)                  | 49 (19.9)           | 0.013      |
| Time since MI, y†                    | 3.9 (1.5-6.9)                           | 3.7 (1.7-6.3)               | 3.8 (1.7-6.4)               | 3.5 (1.6-6.1)              | 2.9 (1.2-6.2)       | 0.10       |
| Smoking status†                      |                                         |                             |                             |                            |                     | <0.001     |
| Never                                | 20 (9.0)                                | 343 (18.0)                  | 224 (17.4)                  | 50 (12.1)                  | 26 (10.6)           |            |
| Former                               | 163 (73.4)                              | 1253 (65.9)                 | 840 (65.4)                  | 306 (74.3)                 | 168 (68.3)          |            |
| Current                              | 39 (17.6)                               | 305 (16.0)                  | 221 (17.2)                  | 56 (13.6)                  | 52 (21.1)           |            |
| Physical activity†                   |                                         |                             |                             |                            |                     | 0.30       |
| Low                                  | 91 (41.2)                               | 780 (41.3)                  | 538 (42.1)                  | 149 (36.3)                 | 94 (38.4)           |            |
| Middle                               | 79 (35.8)                               | 707 (37.4)                  | 468 (36.7)                  | 181 (44.0)                 | 93 (38.0)           |            |
| High                                 | 51 (23.1)                               | 404 (21.4)                  | 271 (21.2)                  | 81 (19.7)                  | 58 (23.7)           |            |
| Highest level of education†          |                                         |                             |                             |                            |                     | 0.15       |
| Primary                              | 47 (21.2)                               | 376 (19.9)                  | 251 (19.6)                  | 74 (18.1)                  | 55 (22.6)           |            |
| Lower secondary                      | 81 (36.5)                               | 648 (34.3)                  | 473 (37.0)                  | 162 (39.6)                 | 98 (40.3)           |            |
| Higher secondary or lower tertiary   | 63 (28.4)                               | 627 (33.1)                  | 386 (30.2)                  | 126 (30.8)                 | 73 (30.0)           |            |
| Higher tertiary                      | 31 (14.0)                               | 241 (12.7)                  | 170 (13.3)                  | 47 (11.5)                  | 17 (7.0)            |            |
| Alcohol intake                       |                                         |                             |                             |                            |                     | <0.001     |
| No                                   | 5 (2.3)                                 | 95 (5.0)                    | 71 (5.5)                    | 23 (5.6)                   | 9 (3.7)             |            |
| Low                                  | 94 (42.3)                               | 980 (51.5)                  | 730 (56.8)                  | 218 (52.9)                 | 133 (54.1)          |            |
| Moderate                             | 58 (26.1)                               | 497 (26.1)                  | 331 (25.8)                  | 108 (26.2)                 | 73 (29.7)           |            |
| High                                 | 65 (29.3)                               | 330 (17.4)                  | 153 (11.9)                  | 63 (15.3)                  | 31 (12.6)           |            |
| Medication use                       |                                         |                             |                             |                            |                     |            |
| Statins                              | 192 (86.5)                              | 1631 (85.8)                 | 1098 (85.5)                 | 355 (86.2)                 | 218 (88.6)          | 0.76       |
| Antithrombotic drugs                 | 216 (97.3)                              | 1855 (97.5)                 | 1256 (97.7)                 | 408 (99.0)                 | 243 (98.8)          | 0.29       |

|                                      | Dietary ALA intake, adjusted for energy |                             |                             |                            |                     | <i>P</i> * |
|--------------------------------------|-----------------------------------------|-----------------------------|-----------------------------|----------------------------|---------------------|------------|
|                                      | ≤0.5 g/d<br>(n=222)                     | >0.5 to 1.0 g/d<br>(n=1902) | >1.0 to 1.5 g/d<br>(n=1285) | >1.5 to 2.0 g/d<br>(n=412) | >2.0 g/d<br>(n=246) |            |
| Antihypertensive drugs               | 195 (87.8)                              | 1718 (90.3)                 | 1150 (89.5)                 | 373 (90.5)                 | 214 (87.0)          | 0.41       |
| Serum lipids, mmol/L <sup>‡,§</sup>  |                                         |                             |                             |                            |                     |            |
| Total cholesterol                    | 4.72±0.92                               | 4.75±0.95                   | 4.71±0.95                   | 4.67±0.93                  | 4.51±0.93           | <0.001     |
| LDL cholesterol                      | 2.59±0.85                               | 2.60±0.81                   | 2.56±0.81                   | 2.55±0.78                  | 2.43±0.83           | 0.007      |
| HDL cholesterol                      | 1.30±0.33                               | 1.30±0.35                   | 1.28±0.34                   | 1.28±0.34                  | 1.23±0.30           | 0.004      |
| Triglycerides                        | 1.59 (1.24-2.09)                        | 1.65 (1.19-2.31)            | 1.66 (1.22-2.35)            | 1.67 (1.21-2.34)           | 1.66 (1.21-2.32)    | 0.98       |
| Plasma glucose, mmol/L <sup>‡</sup>  | 5.50 (5.08-6.18)                        | 5.62 (5.04-6.68)            | 5.61 (5.07-6.58)            | 5.62 (5.08-6.58)           | 5.61 (5.00-6.40)    | 0.95       |
| Blood pressure (mmHg) <sup>†</sup>   |                                         |                             |                             |                            |                     |            |
| Systolic                             | 142±23                                  | 142±22                      | 142±21                      | 142±22                     | 141±20              | 0.59       |
| Diastolic                            | 81±11                                   | 80±11                       | 80±11                       | 81±11                      | 80±11               | 0.76       |
| Prevalent diabetes                   | 26 (11.7)                               | 380 (20.0)                  | 282 (22.0)                  | 84 (20.4)                  | 41 (16.7)           | 0.006      |
| Family history of MI                 | 27 (12.2)                               | 227 (11.9)                  | 142 (11.1)                  | 50 (12.1)                  | 21 (8.5)            | 0.56       |
| Family history of diabetes           | 47 (21.2)                               | 369 (19.4)                  | 292 (22.7)                  | 77 (18.7)                  | 49 (19.9)           | 0.18       |
| Dietary factors                      |                                         |                             |                             |                            |                     |            |
| Energy, kcal/d                       | 2539±466                                | 1879±467                    | 1793±499                    | 2027±524                   | 2186±516            | 0.17       |
| Protein, en%                         | 13.1±2.6                                | 15.1±2.8                    | 15.4±2.8                    | 14.6±2.6                   | 13.9±2.4            | 0.028      |
| Total fat, en%                       | 33.6±7.1                                | 32.2±6.3                    | 33.9±5.4                    | 37.1±4.8                   | 39.7±4.9            | <0.001     |
| SFAs, en%                            | 13.4±3.5                                | 12.4±3.2                    | 12.3±2.8                    | 12.8±2.9                   | 12.6±3.1            | 0.93       |
| <i>cis</i> MUFAs, en%                | 9.0±2.3                                 | 9.1±2.3                     | 9.5±2.1                     | 10.3±1.7                   | 11.0±1.5            | <0.001     |
| PUFAs, en%                           | 6.5±2.1                                 | 6.2±2.3                     | 7.4±1.6                     | 9.3±1.6                    | 11.4±1.7            | <0.001     |
| Total n-3 FAs, en%                   | 0.63±0.28                               | 0.61±0.22                   | 0.72±0.19                   | 0.93±0.19                  | 1.16±0.19           | <0.001     |
| ALA, g/d                             | 0.37±0.13                               | 0.79±0.13                   | 1.21±0.14                   | 1.72±0.14                  | 2.40±0.38           | <0.001     |
| EPA+DHA, mg/d                        | 72 (17-142)                             | 109 (46-188)                | 115 (53-194)                | 107 (47-179)               | 97 (32-162)         | 0.98       |
| Total n-6 FAs, en%                   | 4.8±2.0                                 | 4.5±1.5                     | 5.6±1.6                     | 7.5±1.6                    | 9.4±1.7             | <0.001     |
| <i>trans</i> -FAs, g/d <sup>  </sup> | 2.1±0.7                                 | 1.5±0.6                     | 1.5±0.6                     | 1.7±0.6                    | 1.8±0.6             | <0.001     |
| Carbohydrates, en%                   | 47.5±7.7                                | 47.7±6.9                    | 46.7±6.5                    | 44.1±5.8                   | 42.7±5.2            | <0.001     |
| Fiber, g/d <sup>  </sup>             | 24.0±8.0                                | 21.4±6.7                    | 21.0±6.4                    | 22.0±7.3                   | 22.5±6.2            | 0.80       |
| Cholesterol, mg/d <sup>  </sup>      | 218±83                                  | 181±66                      | 177±69                      | 194±66                     | 192±70              | 0.94       |

|                              | Dietary ALA intake, adjusted for energy |                             |                             |                            |                     | <i>P</i> <sup>*</sup> |
|------------------------------|-----------------------------------------|-----------------------------|-----------------------------|----------------------------|---------------------|-----------------------|
|                              | ≤0.5 g/d<br>(n=222)                     | >0.5 to 1.0 g/d<br>(n=1902) | >1.0 to 1.5 g/d<br>(n=1285) | >1.5 to 2.0 g/d<br>(n=412) | >2.0 g/d<br>(n=246) |                       |
| Total fish (g/d)             | 9.2 (1.1-15.3)                          | 14.0 (5.2-19.6)             | 14.5 (6.2-20.8)             | 13.2 (5.0-19.8)            | 11.5 (3.5-17.6)     | 0.80                  |
| Oily fish (g/d)              | 3.6 (0-8.2)                             | 5.5 (1.3-11.0)              | 5.8 (1.6-11.4)              | 5.3 (1.1-10.2)             | 5.0 (0.6-9.4)       | 0.52                  |
| DHD-15 score                 | 74.0±13.4                               | 79.1±13.5                   | 80.5±13.5                   | 78.6±13.6                  | 79.5±13.4           | 0.014                 |
| Circulating FAs, % total FAs |                                         |                             |                             |                            |                     |                       |
| SFAs                         | 13.4±1.8                                | 13.2±1.1                    | 13.1±1.0                    | 13.0±1.1                   | 13.0±1.0            | <0.001                |
| MUFAs                        | 23.3±3.3                                | 22.8±3.2                    | 22.2±3.2                    | 22.1±3.4                   | 21.6±2.8            | <0.001                |
| PUFAs                        | 61.8±4.6                                | 62.6±4.0                    | 63.4±4.0                    | 63.6±4.1                   | 64.1±3.5            | <0.001                |
| Total n-3 PUFAs              | 2.40 (1.93-3.09)                        | 2.37 (1.95-3.03)            | 2.36 (1.93-2.98)            | 2.30 (1.90-2.82)           | 2.26 (1.88-2.78)    | <0.001                |
| ALA                          | 0.53±0.15                               | 0.51±0.15                   | 0.50±0.14                   | 0.50±0.14                  | 0.49±0.14           | 0.035                 |
| EPA                          | 1.06 (0.77-1.67)                        | 1.07 (0.80-1.58)            | 1.08 (0.80-1.51)            | 1.01 (0.78-1.38)           | 1.00 (0.78-1.41)    | 0.001                 |
| DHA                          | 0.66 (0.50-0.83)                        | 0.67 (0.53-0.84)            | 0.67 (0.54-0.84)            | 0.66 (0.53-0.82)           | 0.64 (0.50-0.82)    | 0.13                  |
| Total n-6 PUFAs              | 58.9±4.9                                | 59.7±4.4                    | 60.6±4.3                    | 60.9±4.4                   | 61.4±3.9            | <0.001                |
| Linoleic acid, 18:2 n-6      | 48.9±5.5                                | 49.6±4.9                    | 50.3±5.0                    | 50.8±5.0                   | 51.0±4.5            | <0.001                |
| Arachidonic acid, 20:4 n-6   | 8.2±1.9                                 | 8.3±2.0                     | 8.5±2.1                     | 8.3±2.0                    | 8.6±2.1             | 0.007                 |

ALA, alpha-linolenic acid; DHA, docosahexaenoic acid; DHD-15, 2015 Dutch Healthy Diet score; EPA, eicosapentaenoic acid; FAs, fatty acids; MI, myocardial infarction; MUFAs, monounsaturated fatty acids; PUFAs, polyunsaturated fatty acids; Q, quintile; SFAs, saturated fatty acids; TFAs, *trans*-fatty acids.

Values are shown as mean ±SD, median (IQR) or *n* (%) unless stated otherwise. <sup>\*</sup>*P* value for linear trend, through median values across categories of intake using a linear regression model, or obtained from chi-square test for categorical variables; <sup>†</sup><1% of patients had missing values for body mass index, time since MI, smoking status, physical activity, educational level and blood pressure; <sup>‡</sup>part of the cohort had missing values for total cholesterol, HDL cholesterol and triglycerides (n=61), LDL cholesterol (n=252) and plasma glucose (n=33); <sup>§</sup>to convert to mg/dL, divide by 0.02586 for total, LDL, HDL cholesterol and by 0.01129 for triglycerides; <sup>||</sup>values for dietary TFAs, fiber and cholesterol were non-energy adjusted.



Supplemental Table 4. Baseline characteristics of the Alpha Omega Cohort in quintiles of circulating ALA

|                                         | Circulating ALA, in quintiles |               |               |               |               | <i>P</i> <sup>*</sup> |
|-----------------------------------------|-------------------------------|---------------|---------------|---------------|---------------|-----------------------|
|                                         | Q1 (n=799)                    | Q2 (n=806)    | Q3 (n=826)    | Q4 (n=823)    | Q5 (n=813)    |                       |
| Circulating ALA, % total FAs (range)    | 0-0.39                        | 0.39-0.46     | 0.46-0.53     | 0.53-0.61     | 0.61-1.66     |                       |
| Age, y                                  | 68.2±5.5                      | 68.9±5.7      | 68.9±5.5      | 69.3±5.6      | 69.5±5.5      | <0.001                |
| Men                                     | 665 (83.2)                    | 667 (82.8)    | 654 (79.2)    | 629 (76.4)    | 606 (74.5)    | <0.001                |
| Body mass index, kg/m <sup>2</sup> †    | 27.6±3.6                      | 28.2±3.8      | 27.9±3.8      | 27.8±4.0      | 27.1±3.6      | <0.001                |
| Obese (≥30 kg/m <sup>2</sup> )          | 184 (23.1)                    | 208 (25.8)    | 204 (24.7)    | 192 (23.4)    | 165 (20.3)    | 0.10                  |
| Time since MI, y <sup>†</sup>           | 3.4 (1.5-6.2)                 | 3.9 (1.8-6.3) | 3.7 (1.6-6.4) | 3.8 (1.6-6.3) | 3.7 (1.7-6.3) | 0.37                  |
| Smoking status <sup>†</sup>             |                               |               |               |               |               | 0.06                  |
| Never                                   | 106 (13.3)                    | 124 (15.4)    | 141 (17.1)    | 133 (16.2)    | 159 (19.6)    |                       |
| Former                                  | 551 (69.0)                    | 546 (67.8)    | 564 (68.3)    | 548 (66.6)    | 521 (64.1)    |                       |
| Current                                 | 142 (17.8)                    | 135 (16.8)    | 121 (14.7)    | 142 (17.3)    | 133 (16.4)    |                       |
| Physical activity <sup>†</sup>          |                               |               |               |               |               | 0.31                  |
| Low                                     | 341 (43.0)                    | 325 (40.5)    | 325 (39.6)    | 321 (39.3)    | 340 (41.9)    |                       |
| Middle                                  | 268 (33.8)                    | 301 (37.5)    | 326 (39.8)    | 323 (39.5)    | 310 (38.2)    |                       |
| High                                    | 185 (23.3)                    | 176 (22.0)    | 169 (20.6)    | 173 (21.2)    | 162 (20.0)    |                       |
| Highest level of education <sup>†</sup> |                               |               |               |               |               | 0.08                  |
| Primary                                 | 151 (19.0)                    | 152 (19.0)    | 155 (18.9)    | 178 (21.7)    | 167 (20.6)    |                       |
| Lower secondary                         | 281 (35.4)                    | 266 (33.2)    | 304 (37.1)    | 298 (36.3)    | 313 (38.7)    |                       |
| Higher secondary or lower tertiary      | 243 (30.6)                    | 279 (34.8)    | 252 (30.8)    | 253 (30.8)    | 248 (30.7)    |                       |
| Higher tertiary                         | 120 (15.1)                    | 104 (13.0)    | 108 (13.2)    | 93 (11.3)     | 81 (10.0)     |                       |
| Alcohol intake                          |                               |               |               |               |               | 0.32                  |
| No                                      | 50 (6.3)                      | 34 (4.2)      | 41 (5.0)      | 37 (4.5)      | 41 (5.0)      |                       |
| Low                                     | 421 (52.7)                    | 459 (57.0)    | 430 (52.1)    | 425 (51.6)    | 420 (51.7)    |                       |
| Moderate                                | 217 (27.2)                    | 189 (23.5)    | 216 (26.2)    | 230 (28.0)    | 215 (26.5)    |                       |
| High                                    | 111 (13.9)                    | 124 (15.4)    | 139 (16.8)    | 131 (15.9)    | 137 (16.9)    |                       |
| Medication use                          |                               |               |               |               |               |                       |
| Statins                                 | 751 (94.0)                    | 732 (90.8)    | 732 (88.6)    | 677 (82.3)    | 602 (74.1)    | <0.001                |
| Antithrombotic drugs                    | 782 (97.9)                    | 791 (98.1)    | 807 (97.7)    | 804 (97.7)    | 794 (97.7)    | 0.96                  |
| Antihypertensive drugs                  | 717 (89.7)                    | 731 (90.7)    | 722 (87.4)    | 741 (90.0)    | 739 (90.9)    | 0.14                  |

|                                      | Circulating ALA, in quintiles |                  |                  |                  |                  | <i>P</i> <sup>*</sup> |
|--------------------------------------|-------------------------------|------------------|------------------|------------------|------------------|-----------------------|
|                                      | Q1 (n=799)                    | Q2 (n=806)       | Q3 (n=826)       | Q4 (n=823)       | Q5 (n=813)       |                       |
| Serum lipids, mmol/L <sup>‡,§</sup>  |                               |                  |                  |                  |                  |                       |
| Total cholesterol                    | 4.45±0.84                     | 4.53±0.90        | 4.72±0.96        | 4.85±0.95        | 5.00±0.99        | <0.001                |
| LDL cholesterol                      | 2.37±0.75                     | 2.43±0.72        | 2.58±0.83        | 2.70±0.84        | 2.78±0.84        | <0.001                |
| HDL cholesterol                      | 1.29±0.34                     | 1.27±0.32        | 1.29±0.35        | 1.28±0.33        | 1.30±0.37        | 0.52                  |
| Triglycerides                        | 1.54 (1.11-2.20)              | 1.59 (1.18-2.20) | 1.67 (1.23-2.31) | 1.71 (1.28-2.41) | 1.79 (1.30-2.52) | <0.001                |
| Plasma glucose, mmol/L <sup>‡</sup>  | 5.59 (5.05-6.54)              | 5.68 (5.07-6.88) | 5.60 (5.03-6.50) | 5.65 (5.12-6.66) | 5.48 (5.00-6.38) | 0.29                  |
| Blood pressure (mmHg) <sup>†</sup>   |                               |                  |                  |                  |                  |                       |
| Systolic                             | 141±21                        | 143±21           | 143±21           | 142±23           | 142±21           | 0.47                  |
| Diastolic                            | 80±11                         | 80±11            | 81±11            | 80±12            | 80±11            | 0.31                  |
| Prevalent diabetes                   | 159 (19.9)                    | 194 (24.1)       | 140 (17.0)       | 175 (21.3)       | 145 (17.8)       | 0.003                 |
| Family history of MI                 | 94 (11.8)                     | 92 (11.4)        | 95 (11.5)        | 89 (10.8)        | 97 (11.9)        | 0.96                  |
| Family history of diabetes           | 177 (22.2)                    | 173 (21.5)       | 156 (18.9)       | 180 (21.9)       | 148 (18.2)       | 0.15                  |
| Dietary factors                      |                               |                  |                  |                  |                  |                       |
| Energy, kcal/d                       | 1908±527                      | 1899±497         | 1909±492         | 1919±507         | 1971±563         | 0.006                 |
| Protein, en%                         | 14.9±2.7                      | 15.2±2.8         | 14.9±2.8         | 15.0±2.7         | 14.9±2.9         | 0.32                  |
| Total fat, en%                       | 33.6±6.3                      | 33.7±5.8         | 33.6±6.3         | 34.1±6.3         | 33.9±6.2         | 0.26                  |
| SFAs, en%                            | 12.2±3.0                      | 12.4±2.8         | 12.5±3.1         | 12.7±3.2         | 12.6±3.2         | 0.002                 |
| <i>cis</i> MUFAs, en%                | 9.7±2.2                       | 9.5±2.1          | 9.4±2.2          | 9.5±2.2          | 9.4±2.2          | 0.025                 |
| PUFAs, en%                           | 7.3±2.3                       | 7.3±2.2          | 7.1±2.2          | 7.2±2.2          | 7.2±2.3          | 0.59                  |
| Total n-3 FAs, en%                   | 0.71±0.26                     | 0.72±0.25        | 0.70±0.25        | 0.71±0.25        | 0.72±0.26        | 0.34                  |
| ALA, g/d <sup>  </sup>               | 1.11±0.52                     | 1.12±0.49        | 1.06±0.45        | 1.09±0.51        | 1.07±0.51        | 0.06                  |
| EPA+DHA, mg/d <sup>  </sup>          | 104 (46-178)                  | 112 (46-189)     | 111 (48-186)     | 106 (46-189)     | 108 (45-189)     | 0.21                  |
| Total n-6 FAs, en%                   | 5.7±2.1                       | 5.6±2.1          | 5.3±2.0          | 5.5±2.0          | 5.4±2.1          | 0.022                 |
| <i>trans</i> -FAs, g/d <sup>  </sup> | 1.5±0.7                       | 1.5±0.6          | 1.6±0.6          | 1.6±0.6          | 1.6±0.7          | 0.018                 |
| Carbohydrates, en%                   | 47.1±6.8                      | 46.8±6.6         | 46.8±6.8         | 46.4±6.8         | 46.6±6.9         | 0.12                  |
| Fiber, g/d <sup>  </sup>             | 21.3±6.6                      | 21.6±6.6         | 21.6±6.8         | 21.5±6.8         | 21.8±7.0         | 0.18                  |
| Cholesterol, mg/d <sup>  </sup>      | 179±66                        | 183±67           | 182±69           | 187±71           | 188±71           | 0.004                 |
| Total fish (g/d)                     | 13.5 (5.3-19.0)               | 14.0 (5.5-20.5)  | 13.7 (5.4-20.3)  | 13.7 (5.8-19.7)  | 13.0 (4.6-19.0)  | 0.84                  |
| Oily fish (g/d)                      | 5.3 (1.3-9.8)                 | 5.4 (1.2-10.8)   | 5.5 (1.2-11.4)   | 5.7 (1.2-11.1)   | 5.2 (1.2-10.8)   | 0.64                  |

|                              | Circulating ALA, in quintiles |                  |                  |                  |                  | <i>P</i> <sup>*</sup> |
|------------------------------|-------------------------------|------------------|------------------|------------------|------------------|-----------------------|
|                              | Q1 (n=799)                    | Q2 (n=806)       | Q3 (n=826)       | Q4 (n=823)       | Q5 (n=813)       |                       |
| DHD-15 score                 | 79.9±14.2                     | 79.5±13.3        | 79.6±14.0        | 78.0±12.9        | 79.2±13.4        | 0.09                  |
| Circulating FAs, % total FAs |                               |                  |                  |                  |                  |                       |
| SFAs                         | 13.1±1.2                      | 13.2±1.0         | 13.2±1.1         | 13.1±1.0         | 13.1±1.2         | 0.39                  |
| MUFAs                        | 22.1±3.3                      | 22.5±2.9         | 22.6±3.1         | 22.6±3.2         | 22.7±3.4         | <0.001                |
| PUFAs                        | 63.5±4.2                      | 63.0±3.7         | 62.8±3.9         | 62.8±4.0         | 62.7±4.2         | <0.001                |
| Total n-3 PUFAs              | 1.98 (1.63-2.55)              | 2.26 (1.88-2.84) | 2.39 (2.01-2.99) | 2.44 (2.04-3.05) | 2.62 (2.20-3.30) | <0.001                |
| EPA                          | 0.87 (0.64-1.28)              | 1.02 (0.78-1.45) | 1.10 (0.87-1.56) | 1.13 (0.84-1.60) | 1.17 (0.86-1.69) | <0.001                |
| DHA                          | 0.68 (0.56-0.84)              | 0.70 (0.57-0.86) | 0.68 (0.55-0.85) | 0.64 (0.52-0.82) | 0.62 (0.48-0.80) | <0.001                |
| Total n-6 PUFAs              | 61.1±4.5                      | 60.3±4.0         | 59.9±4.3         | 60.0±4.3         | 59.6±4.6         | <0.001                |
| Linoleic acid, 18:2n-6       | 49.7±5.3                      | 49.5±4.7         | 49.7±4.9         | 50.2±4.8         | 50.7±5.0         | <0.001                |
| Arachidonic acid, 20:4n-6    | 9.6±2.1                       | 9.0±2.0          | 8.3±1.8          | 7.9±1.8          | 7.1±1.6          | <0.001                |

ALA, alpha-linolenic acid; DHA, docosahexaenoic acid; DHD-15, 2015 Dutch Healthy Diet score; EPA, eicosapentaenoic acid; FAs, fatty acids; MI, myocardial infarction; MUFAs, monounsaturated fatty acids; PUFAs, polyunsaturated fatty acids; Q, quintile; SFAs, saturated fatty acids; TFAs, *trans*-fatty acids.

Values are shown as mean ±SD, median (IQR) or *n* (%) unless stated otherwise. \**P* value for linear trend, through median values across categories of intake using a linear regression model, or obtained from chi-square test for categorical variables; †<1% of patients had missing values for body mass index, time since MI, smoking status, physical activity, educational level and blood pressure; ‡part of the cohort had missing values for total cholesterol, HDL cholesterol and triglycerides (n=61), LDL cholesterol (n=252) and plasma glucose (n=33); §to convert to mg/dL, divide by 0.02586 for total, LDL, HDL cholesterol and by 0.01129 for triglycerides; ||values for dietary TFAs, fiber and cholesterol were non-energy adjusted.

Supplemental Table 5. Associations of circulating EPA+DHA in categories based on converted Omega-3 index cut-offs with CHD, CVD and all-cause mortality in the Alpha Omega Cohort

|                                           | Categories of circulating n-3 fatty acids |                       |                      |                  | <i>P</i> trend* |
|-------------------------------------------|-------------------------------------------|-----------------------|----------------------|------------------|-----------------|
|                                           | ≤1.3% (n=844)                             | >1.3 to ≤2.2 (n=2058) | >2.2 to ≤3.1 (n=739) | >3.1 (n=426)     |                 |
| Median circulating EPA+DHA,<br>% total FA | 1.12                                      | 1.66                  | 2.54                 | 3.73             |                 |
| Person-years                              | 9169                                      | 22,779                | 8460                 | 4821             |                 |
| <i>CHD mortality</i>                      |                                           |                       |                      |                  |                 |
| Cases, <i>n</i>                           | 127                                       | 250                   | 90                   | 48               |                 |
| Age- and sex-adjusted HR                  | 1.00                                      | 0.82 (0.66-1.01)      | 0.80 (0.61-1.05)     | 0.71 (0.51-0.98) | 0.06            |
| Multivariable HR <sup>†</sup>             | 1.00                                      | 0.80 (0.64-1.01)      | 0.80 (0.60-1.07)     | 0.63 (0.44-0.90) | 0.026           |
| <i>CVD mortality</i>                      |                                           |                       |                      |                  |                 |
| Cases, <i>n</i>                           | 189                                       | 411                   | 155                  | 79               |                 |
| Age- and sex-adjusted HR                  | 1.00                                      | 0.89 (0.75-1.06)      | 0.91 (0.73-1.12)     | 0.77 (0.59-1.00) | 0.09            |
| Multivariable HR                          | 1.00                                      | 0.87 (0.73-1.05)      | 0.90 (0.71-1.13)     | 0.70 (0.53-0.93) | 0.038           |
| <i>All-cause mortality</i>                |                                           |                       |                      |                  |                 |
| Cases, <i>n</i>                           | 436                                       | 945                   | 313                  | 183              |                 |
| Age- and sex-adjusted HR                  | 1.00                                      | 0.89 (0.80-0.99)      | 0.80 (0.69-0.92)     | 0.77 (0.65-0.94) | 0.001           |
| Multivariable HR                          | 1.00                                      | 0.90 (0.80-1.01)      | 0.81 (0.69-0.94)     | 0.73 (0.60-0.87) | <0.001          |

CHD, coronary heart disease; CVD, cardiovascular disease; DHA, docosahexaenoic acid; EPA, eicosapentaenoic acid; FA, fatty acid; Q, quintile; ref., reference; values in Table represent hazard ratios (HRs) with 95% confidence intervals, estimated from multivariable Cox models; \**P* for linear trend, through median values across categories of circulating EPA+DHA, using a linear regression model; <sup>†</sup>HRs were adjusted for age, sex, educational level, physical activity, smoking status, alcohol intake, obesity, prevalent diabetes, cardiovascular drugs, serum cholesterol, circulating 18:2 n-6 (linoleic acid), and circulating 20:4 n-6 (arachidonic acid).

Supplemental Table 6. Sensitivity analyses for continuous associations of dietary and circulating n-3 FAs with all-cause, CVD and CHD mortality in the Alpha Omega Cohort

|                                                       | EPA+DHA          |                  |                     | ALA              |                  |                     |
|-------------------------------------------------------|------------------|------------------|---------------------|------------------|------------------|---------------------|
|                                                       | CHD mortality    | CVD mortality    | All-cause mortality | CHD mortality    | CVD mortality    | All-cause mortality |
| <i>Dietary intake</i>                                 |                  |                  |                     |                  |                  |                     |
| Main analysis ( <i>n</i> =4067)                       | 0.92 (0.86-0.98) | 0.96 (0.92-1.01) | 0.97 (0.94- 1.00)   | 0.87 (0.72-1.05) | 0.91 (0.79-1.05) | 0.98 (0.89- 1.07)   |
| Excluding $\leq 2$ y follow-up ( <i>n</i> =3921)      | 0.95 (0.89-1.01) | 0.98 (0.93-1.03) | 0.98 (0.95- 1.01)   | 0.89 (0.73-1.08) | 0.93 (0.80-1.08) | 1.00 (0.90- 1.10)   |
| Excluding fish oil supplement users ( <i>n</i> =3880) | 0.92 (0.86-0.98) | 0.96 (0.92-1.01) | 0.97 (0.94, 1.00)   | 0.88 (0.73-1.06) | 0.91 (0.79-1.06) | 0.97 (0.88- 1.07)   |
| <i>Circulating levels</i>                             |                  |                  |                     |                  |                  |                     |
| Main analysis ( <i>n</i> =4067)                       | 0.85 (0.77-0.95) | 0.88 (0.82-0.96) | 0.90 (0.85, 0.94)   | 1.01 (0.92-1.11) | 1.02 (0.95-1.10) | 1.01 (0.96- 1.06)   |
| Excluding $\leq 2$ y follow-up ( <i>n</i> =3921)      | 0.86 (0.77-0.97) | 0.89 (0.82-0.97) | 0.90 (0.85- 0.95)   | 0.98 (0.89-1.09) | 1.00 (0.93-1.08) | 1.01 (0.96- 1.06)   |
| Excluding fish oil supplement users ( <i>n</i> =3880) | 0.85 (0.76-0.94) | 0.88 (0.81-0.96) | 0.90 (0.86-0.95)    | 1.02 (0.92-1.11) | 1.02 (0.95-1.10) | 1.02 (0.97- 1.07)   |

ALA, alpha-linoleic acid; CHD, coronary heart disease; CVD, cardiovascular disease; DHA, docosahexaenoic acid; EPA, eicosapentaenoic acid, FAs, fatty acids, MI, myocardial infarction; values in Table represent hazard ratios (HRs) with 95% confidence intervals, estimated from multivariable Cox models (see Methods); HRs are expressed per 100 mg/d of dietary EPA+DHA, per 1 g/d of dietary ALA or per 1-SD of circulating EPA+DHA or ALA; numbers (*n*) refer to patients included in the analysis.

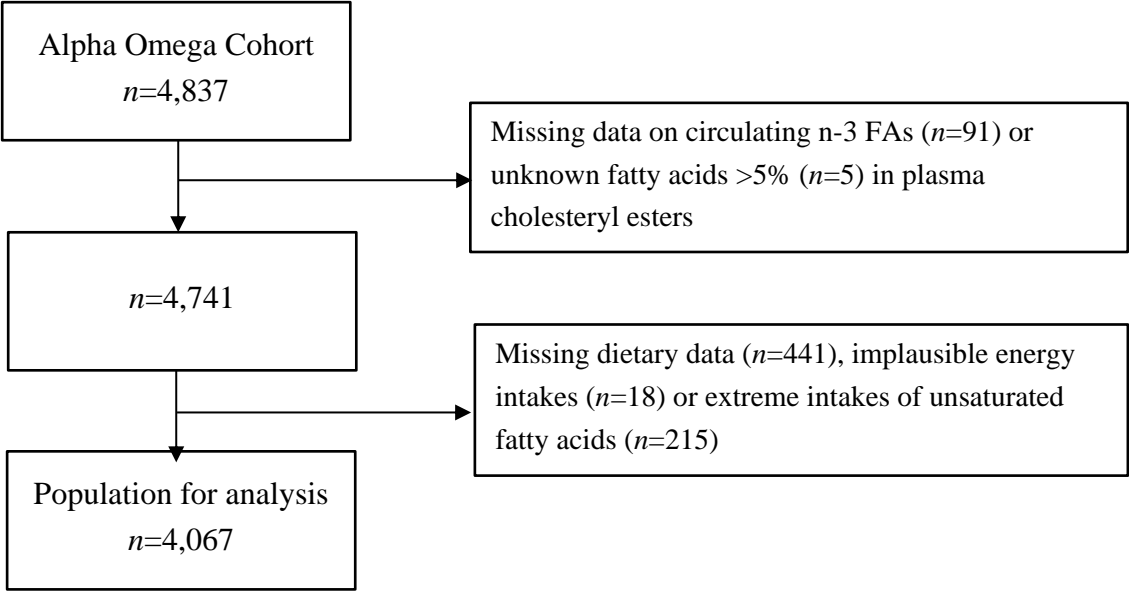

Supplemental Figure 1. Flow diagram for selecting the population for analysis from the Alpha Omega Cohort.

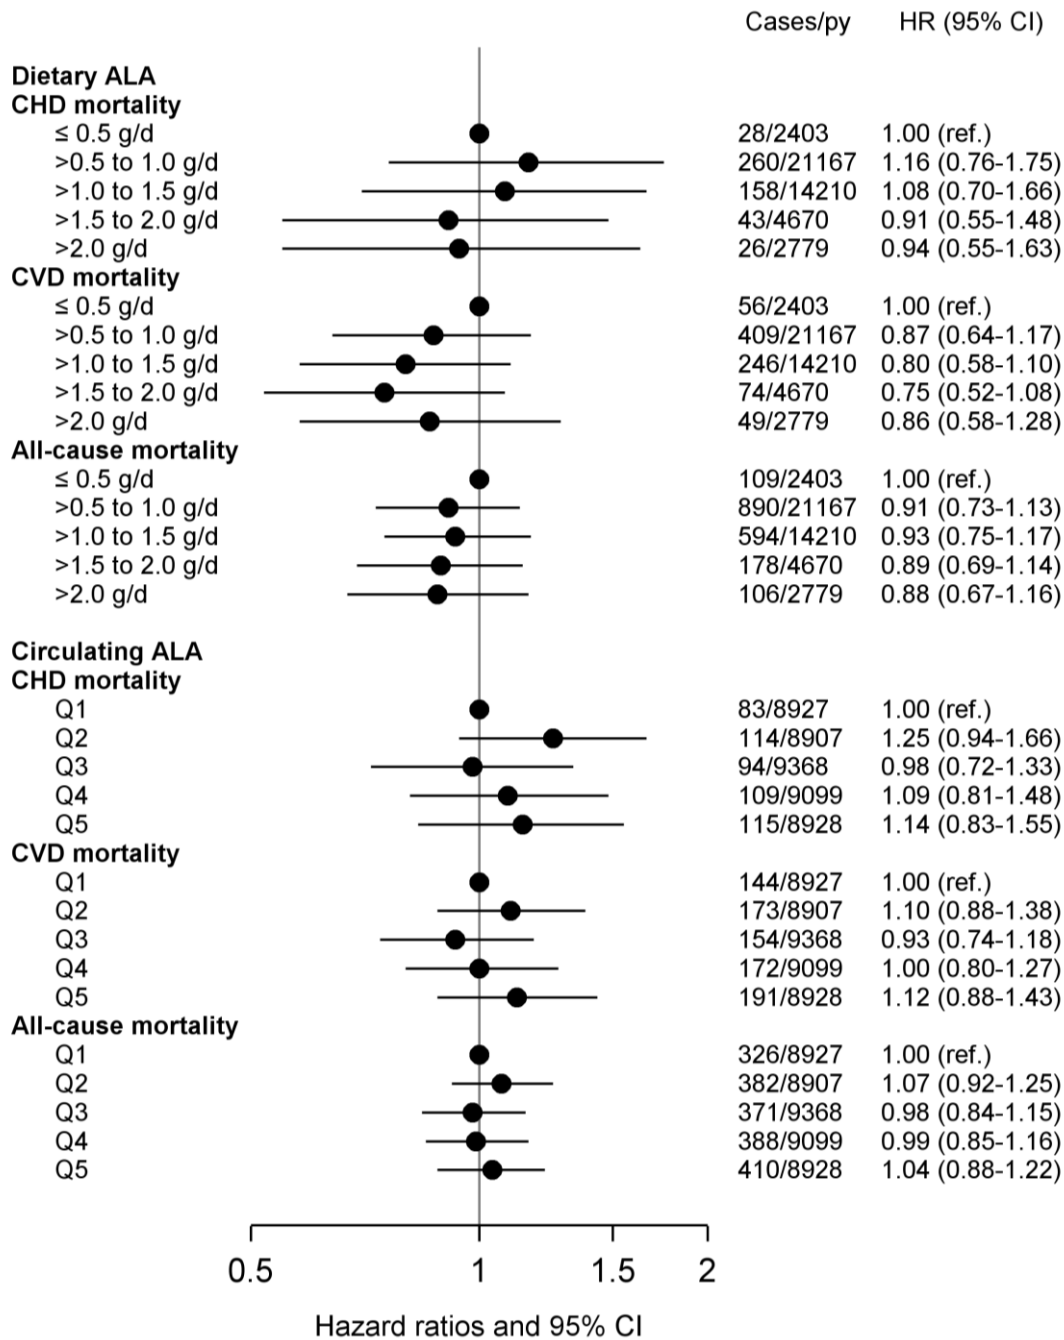

Supplemental Figure 2. Associations of dietary ALA (in categories) and circulating ALA (in quintiles) with CHD, CVD and all-cause mortality.

ALA, alpha-linoleic acid; CHD, coronary heart disease; CVD, cardiovascular disease; py, person-years; Q, quintile; ref., reference.

Hazard ratios (HRs) and 95% confidence intervals (CIs) were obtained from multivariable Cox models, using the lowest category as reference; HRs for dietary ALA were adjusted for age, sex, education level, physical activity, smoking status, alcohol intake, obesity, prevalent diabetes, cardiovascular drugs, time since MI, and intake of total energy, cholesterol, fiber and *trans* fatty acids; HRs for circulating ALA were adjusted for the same covariates except dietary factors, plus serum total cholesterol, circulating 18:2 n-6 and circulating 20:4 n-6; All *P* values for linear trend >0.05.

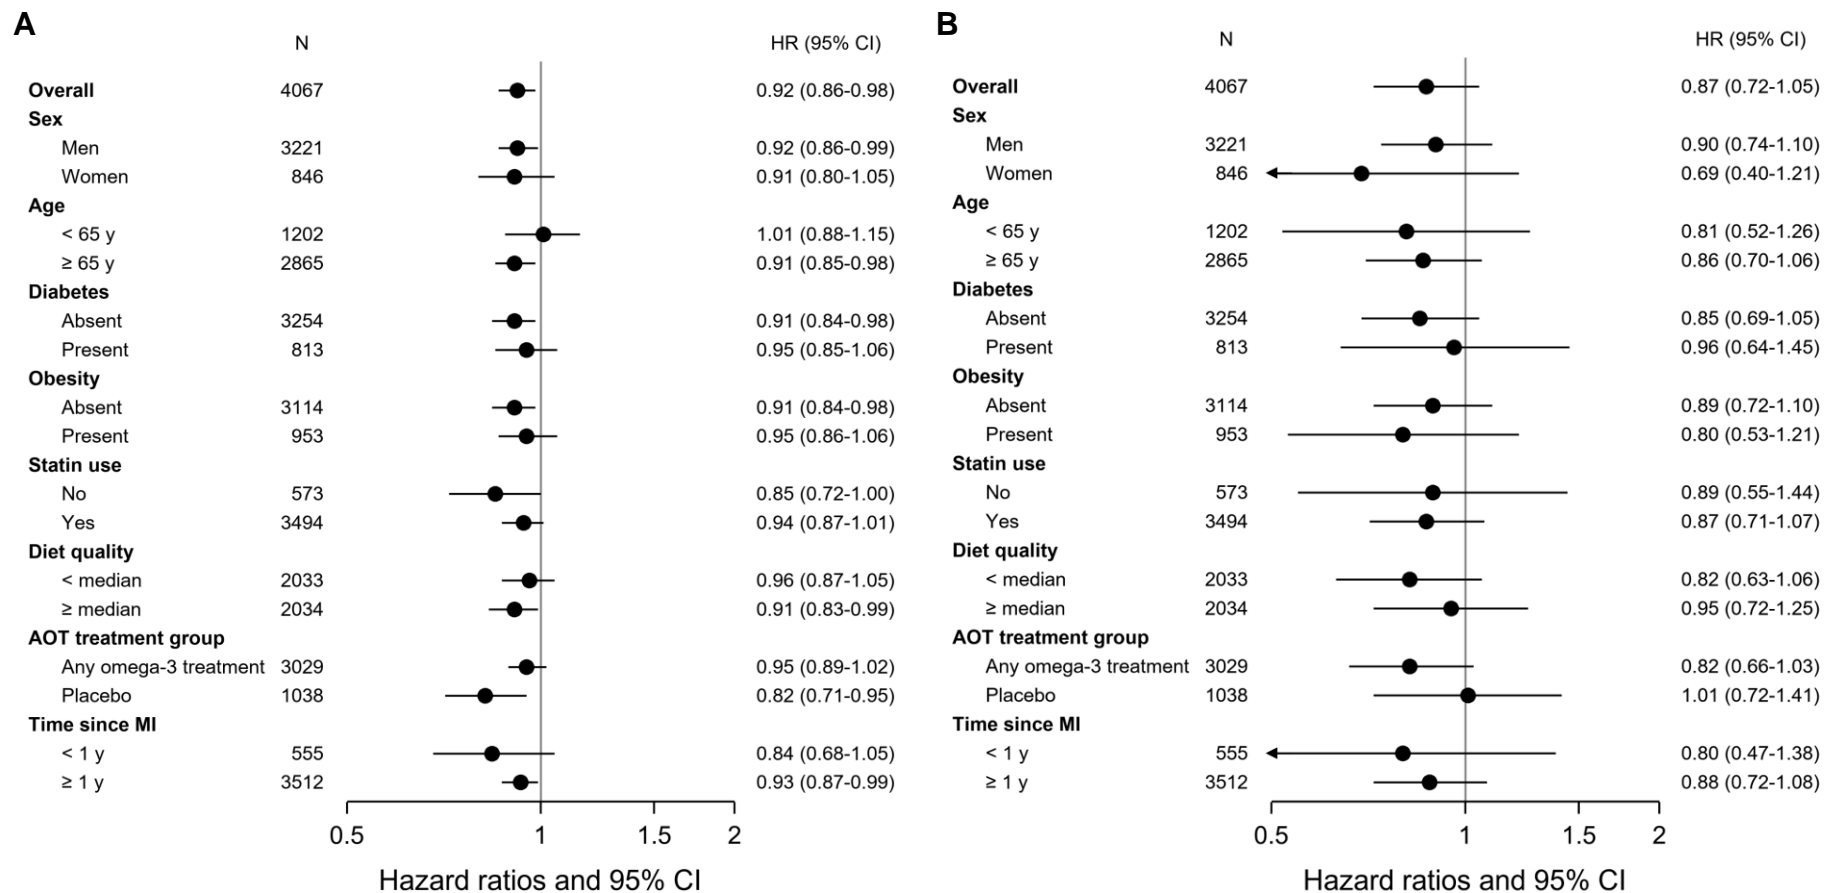

Supplemental Figure 3. Associations of dietary (A) EPA+DHA (per 100 mg/d) and (B) ALA (per 1 g/d) with CHD mortality in subgroups of the Alpha Omega Cohort.

ALA, alpha-linoleic acid; AOT, Alpha Omega Trial; CHD, coronary heart disease; DHA, docosahexaenoic acid; EPA, eicosapentaenoic acid; hazard ratios (HRs) and 95% confidence intervals (CIs) were obtained from multivariable Cox models (see Methods); dietary quality was based on the 2015 Dutch Healthy Diet score (DHD-15; median: 79, range: 33-125);  $P = 0.07$  for interaction between EPA+DHA and AOT treatment group;  $P > 0.10$  for other interactions.



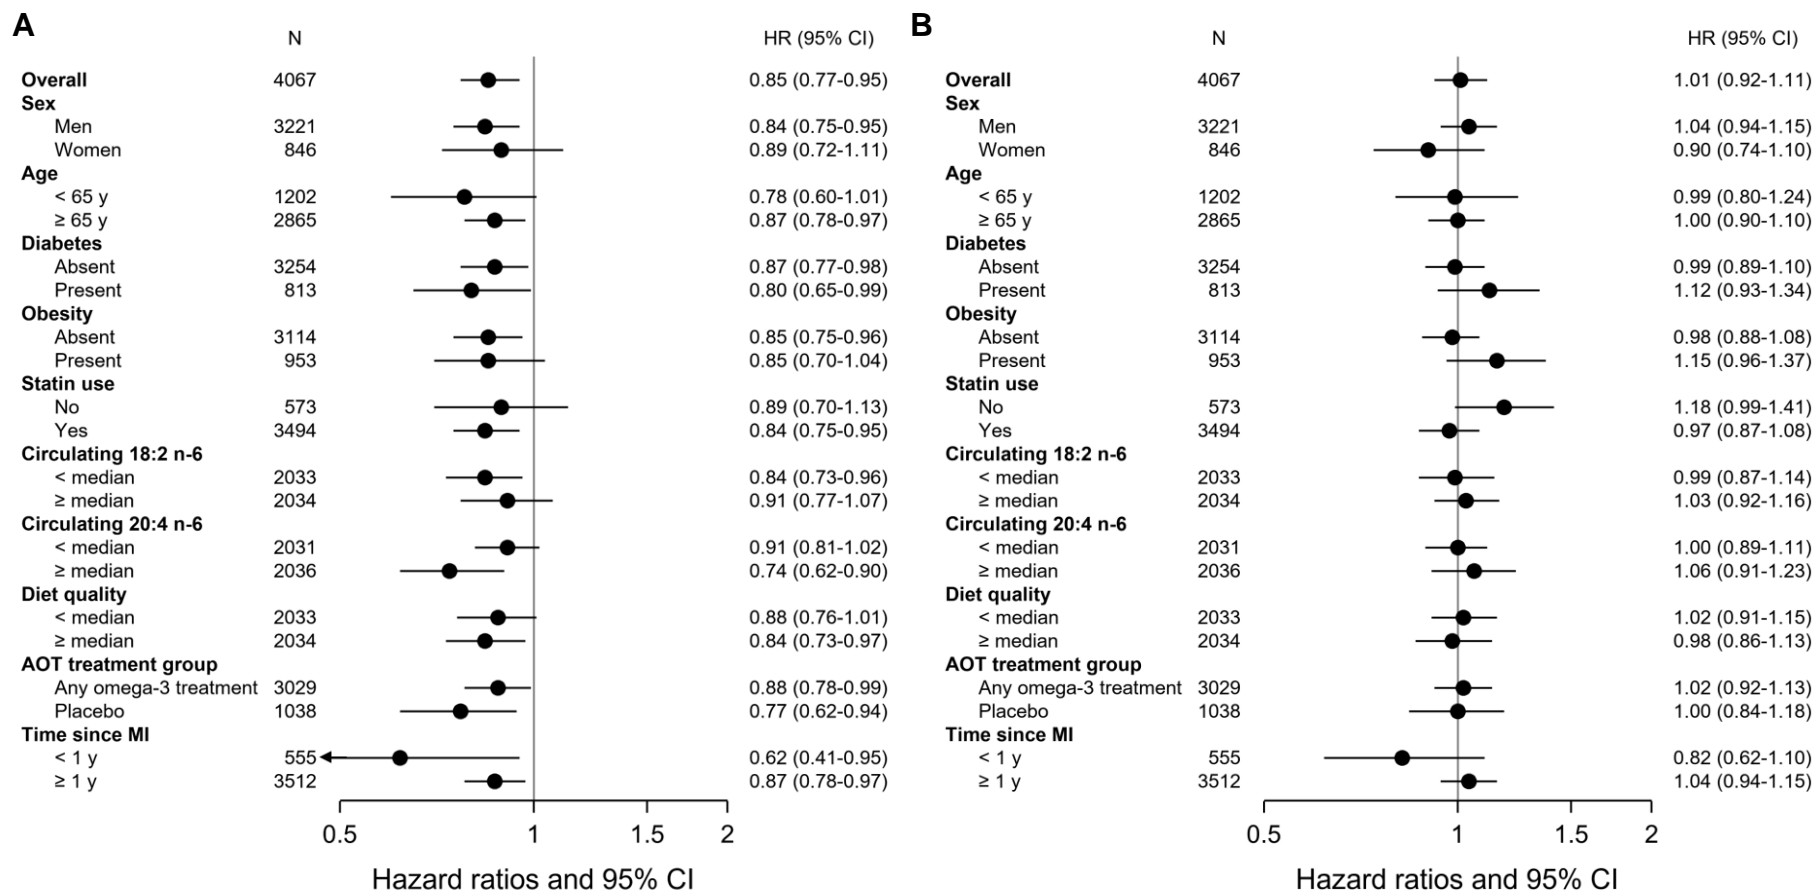

Supplemental Figure 4. Associations of circulating (A) EPA+DHA (per 1-SD) and (B) ALA (per 1-SD) with CHD mortality in subgroups of the Alpha Omega Cohort.

ALA, alpha-linoleic acid; AOT, Alpha Omega Trial; CHD, coronary heart disease; DHA, docosahexaenoic acid; EPA, eicosapentaenoic acid; hazard ratios (HRs) and 95% confidence intervals (CIs) were obtained from multivariable Cox models (see Methods); median circulating 18:2 n-6 (linoleic acid) was 49.96 % total FAs; median circulating 20:4 n-6 (arachidonic acid) was 8.26 % total FAs; dietary quality was based on the 2015 Dutch Healthy Diet score (DHD-15);

## Online Supporting Material

median: 79, range: 33-125);  $P = 0.07$  for interaction between EPA+DHA and circulating 20:4 n-6 (arachidonic acid);  $P = 0.06$  for interaction between ALA and statin use;  $P > 0.10$  for other interactions.
